# Supplementary material
Source: publisher site journal article supplement (https://www.dovepress.com/article/304138)

**Figure S1:** UV-Vis absorbance spectra of citrate capped silver nanoparticle samples with increasing sizes: 10 nm: AgNP‑I (Left), 20 nm: AgNP‑II (Middle) and 50 nm: AgNP‑III (Right) over 24 hours in different pH values.


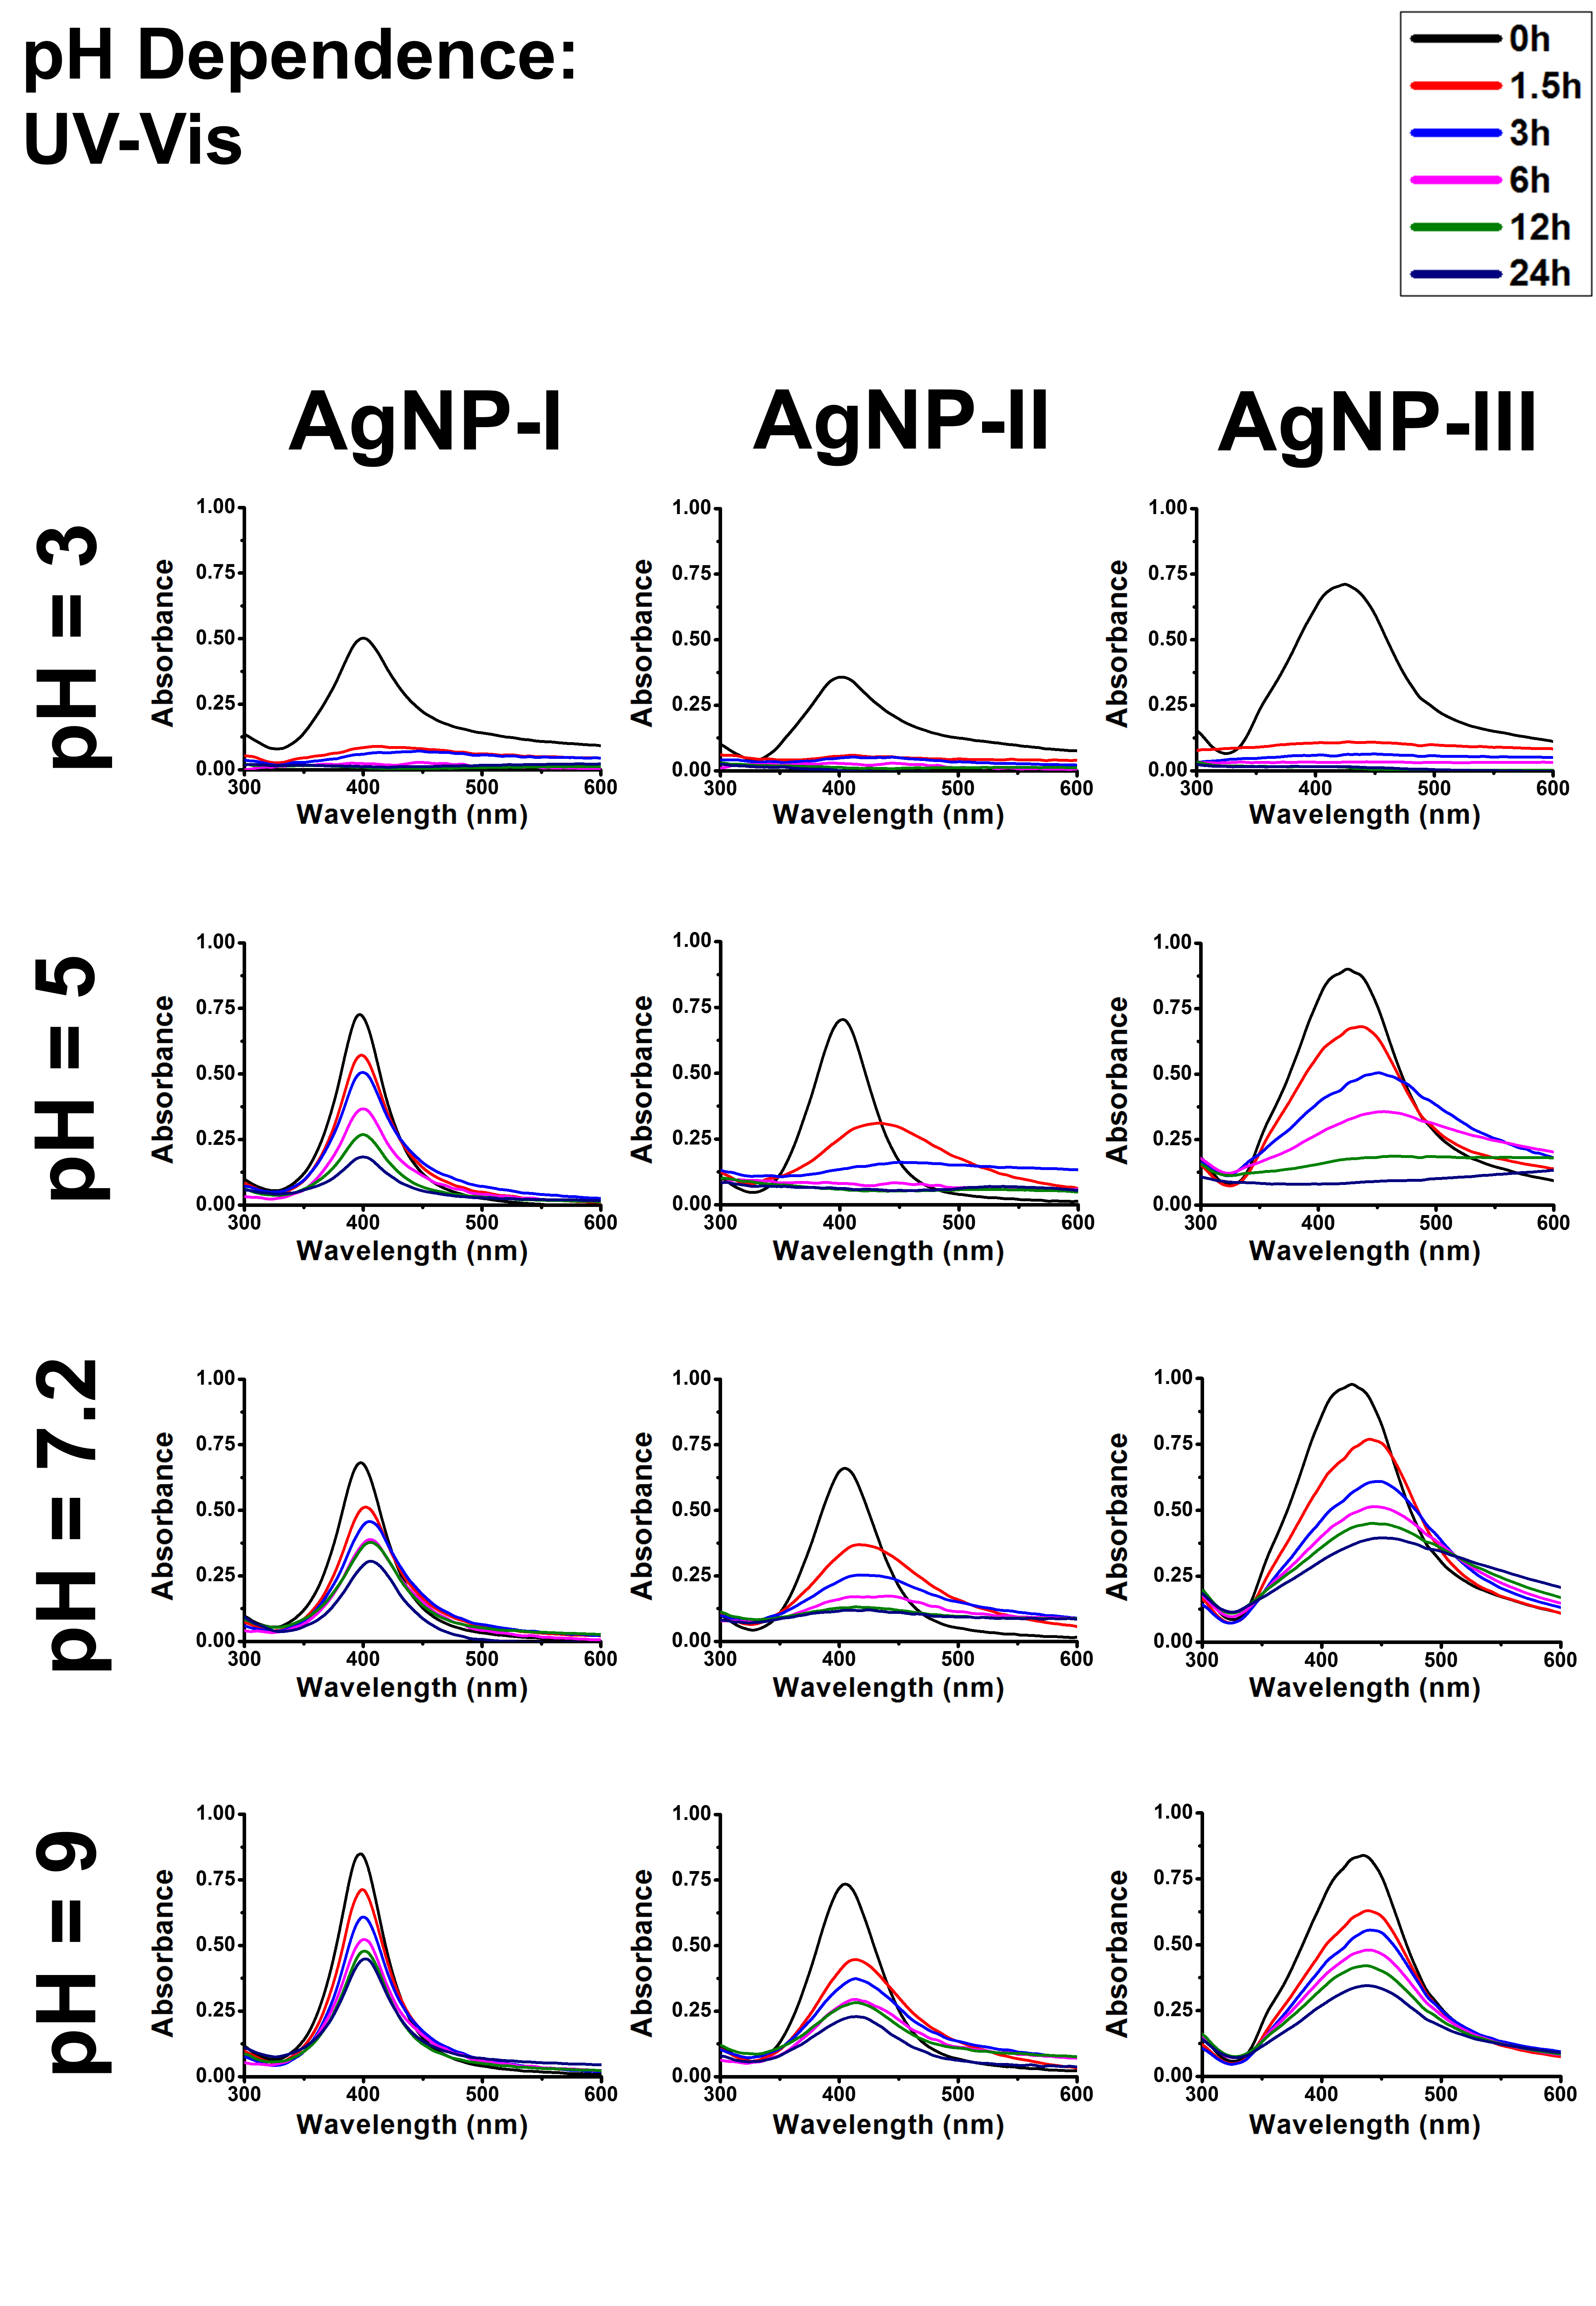


**Figure S2:** UV-Vis absorbance spectra of citrate capped silver nanoparticle samples with increasing sizes: 10 nm: AgNP‑I (Left), 20 nm: AgNP‑II (Middle) and 50 nm: AgNP‑III (Right) over 24 hours in different NaCl concentrations.


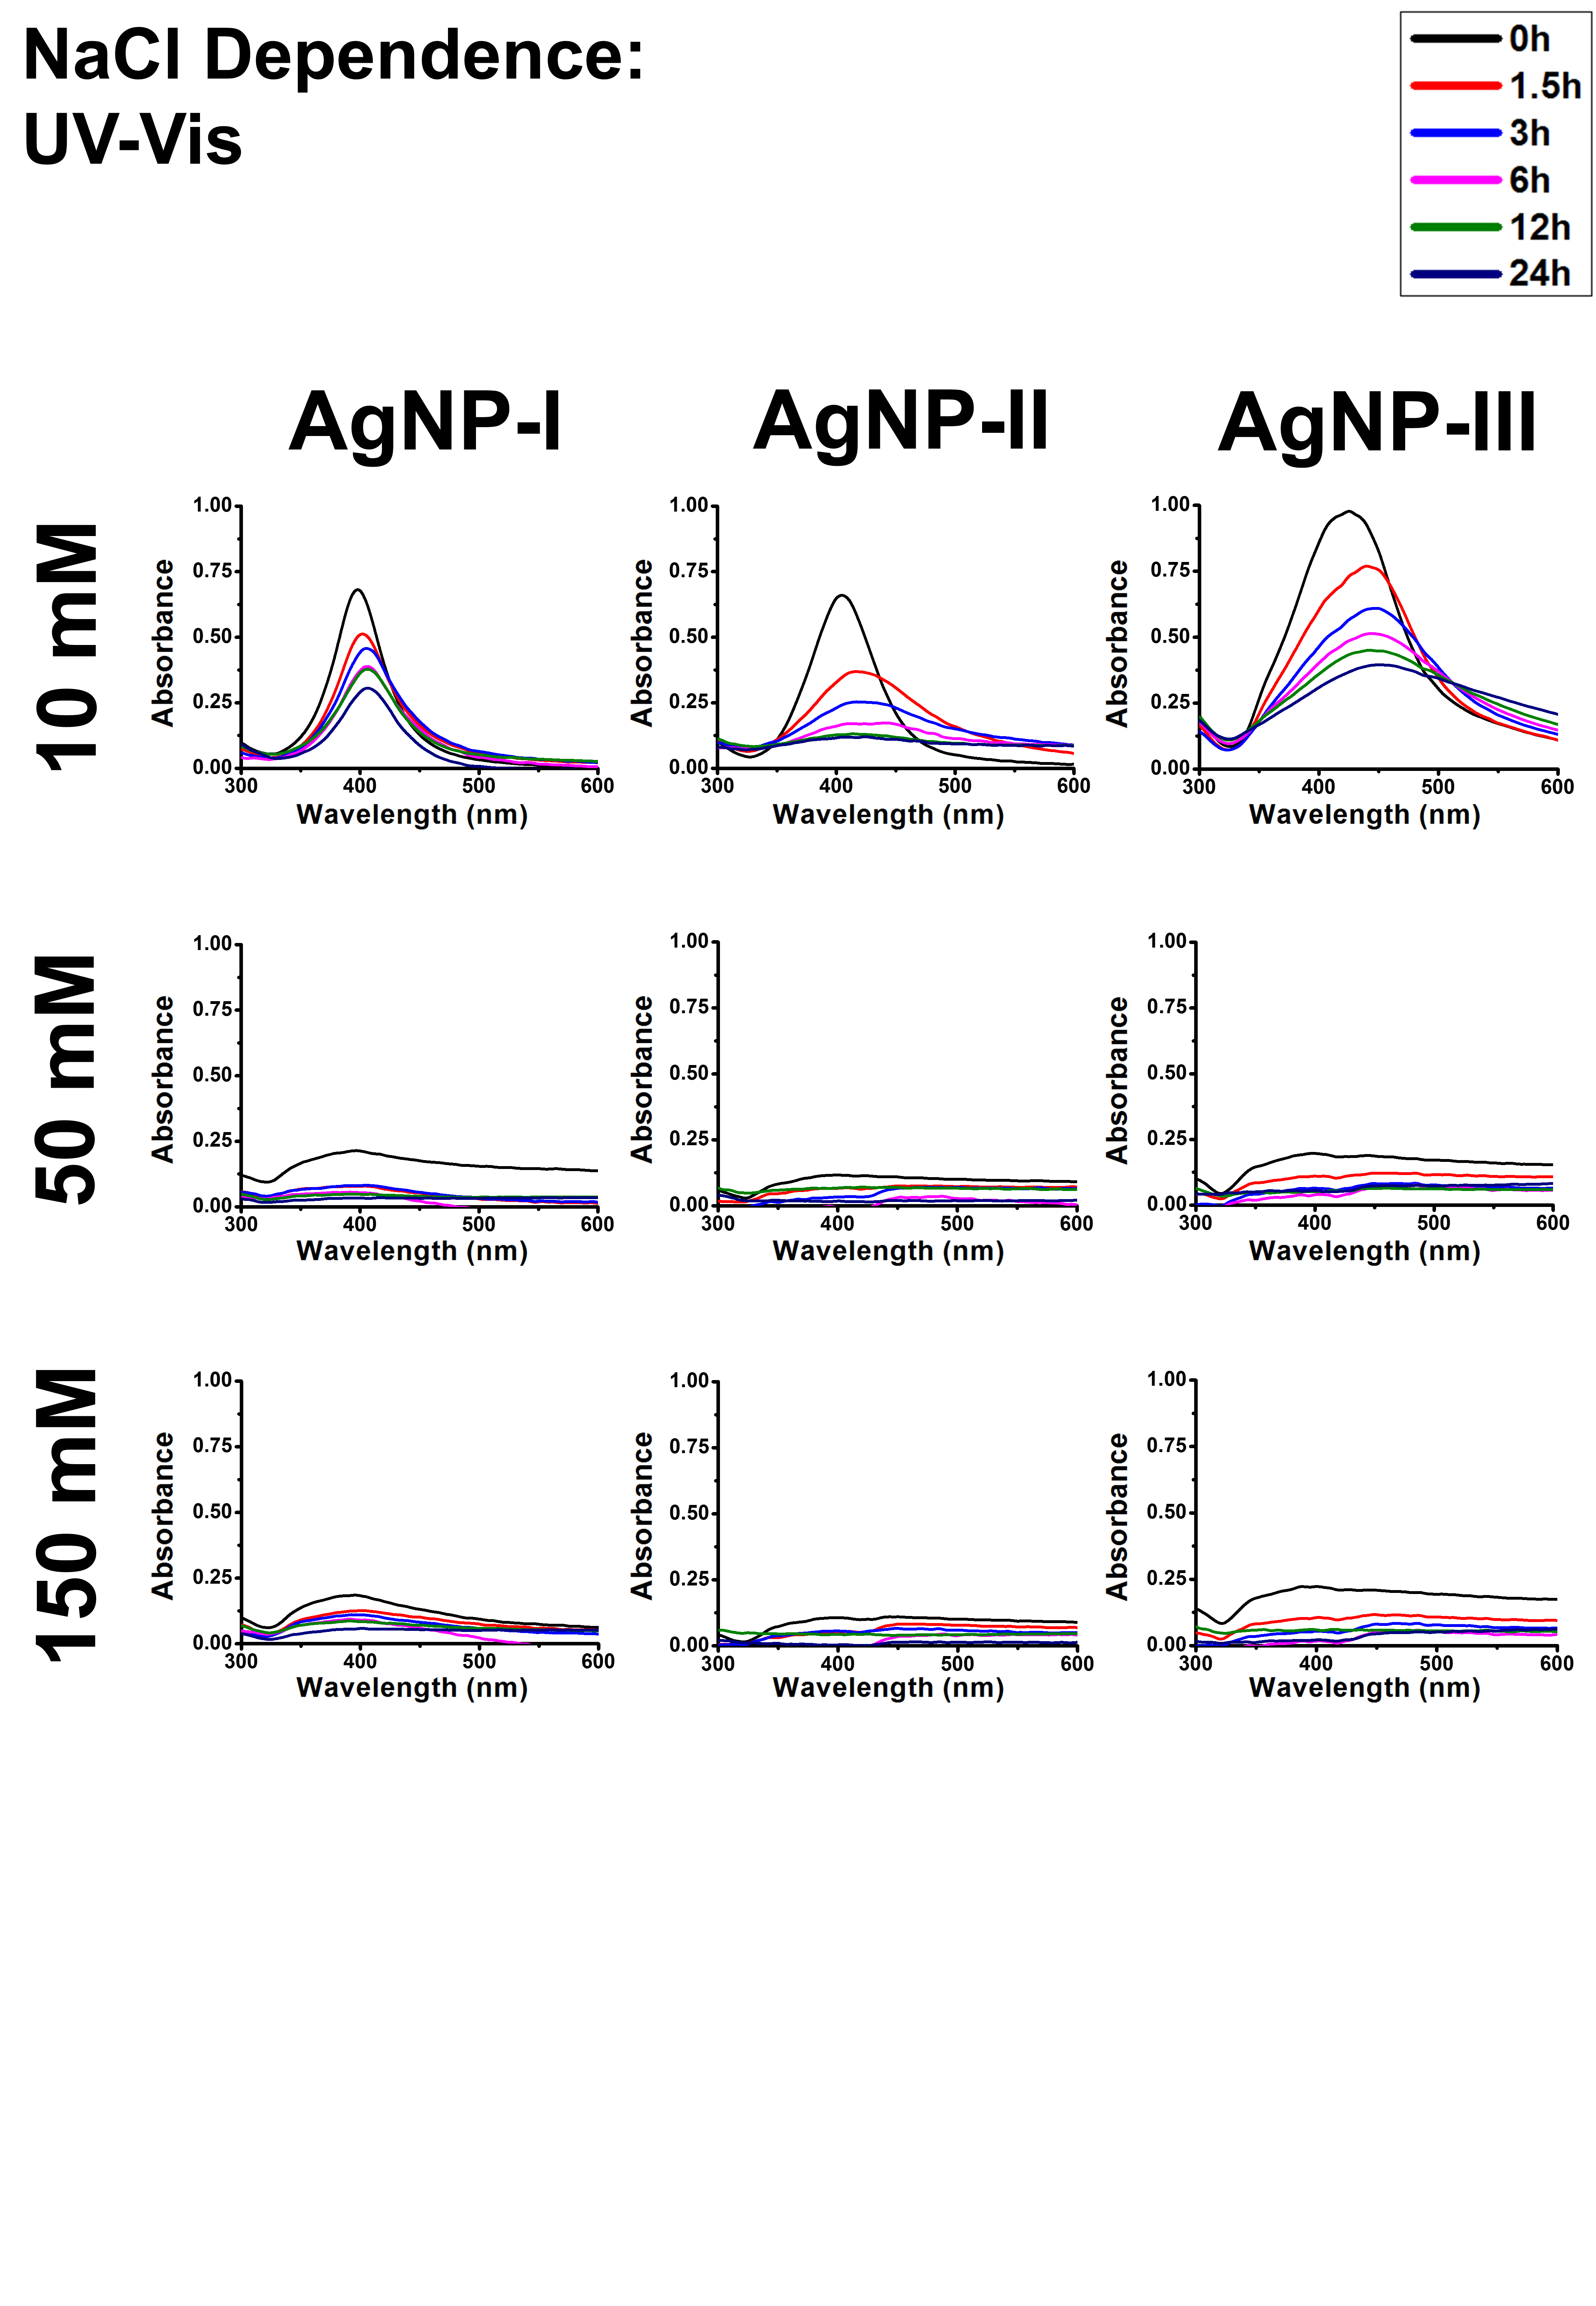


**Figure S3:** UV-Vis absorbance spectra of citrate capped silver nanoparticle samples with increasing sizes: 10 nm: AgNP‑I (Left), 20 nm: AgNP‑II (Middle) and 50 nm: AgNP‑III (Right) over 24 hours in different glucose concentrations.


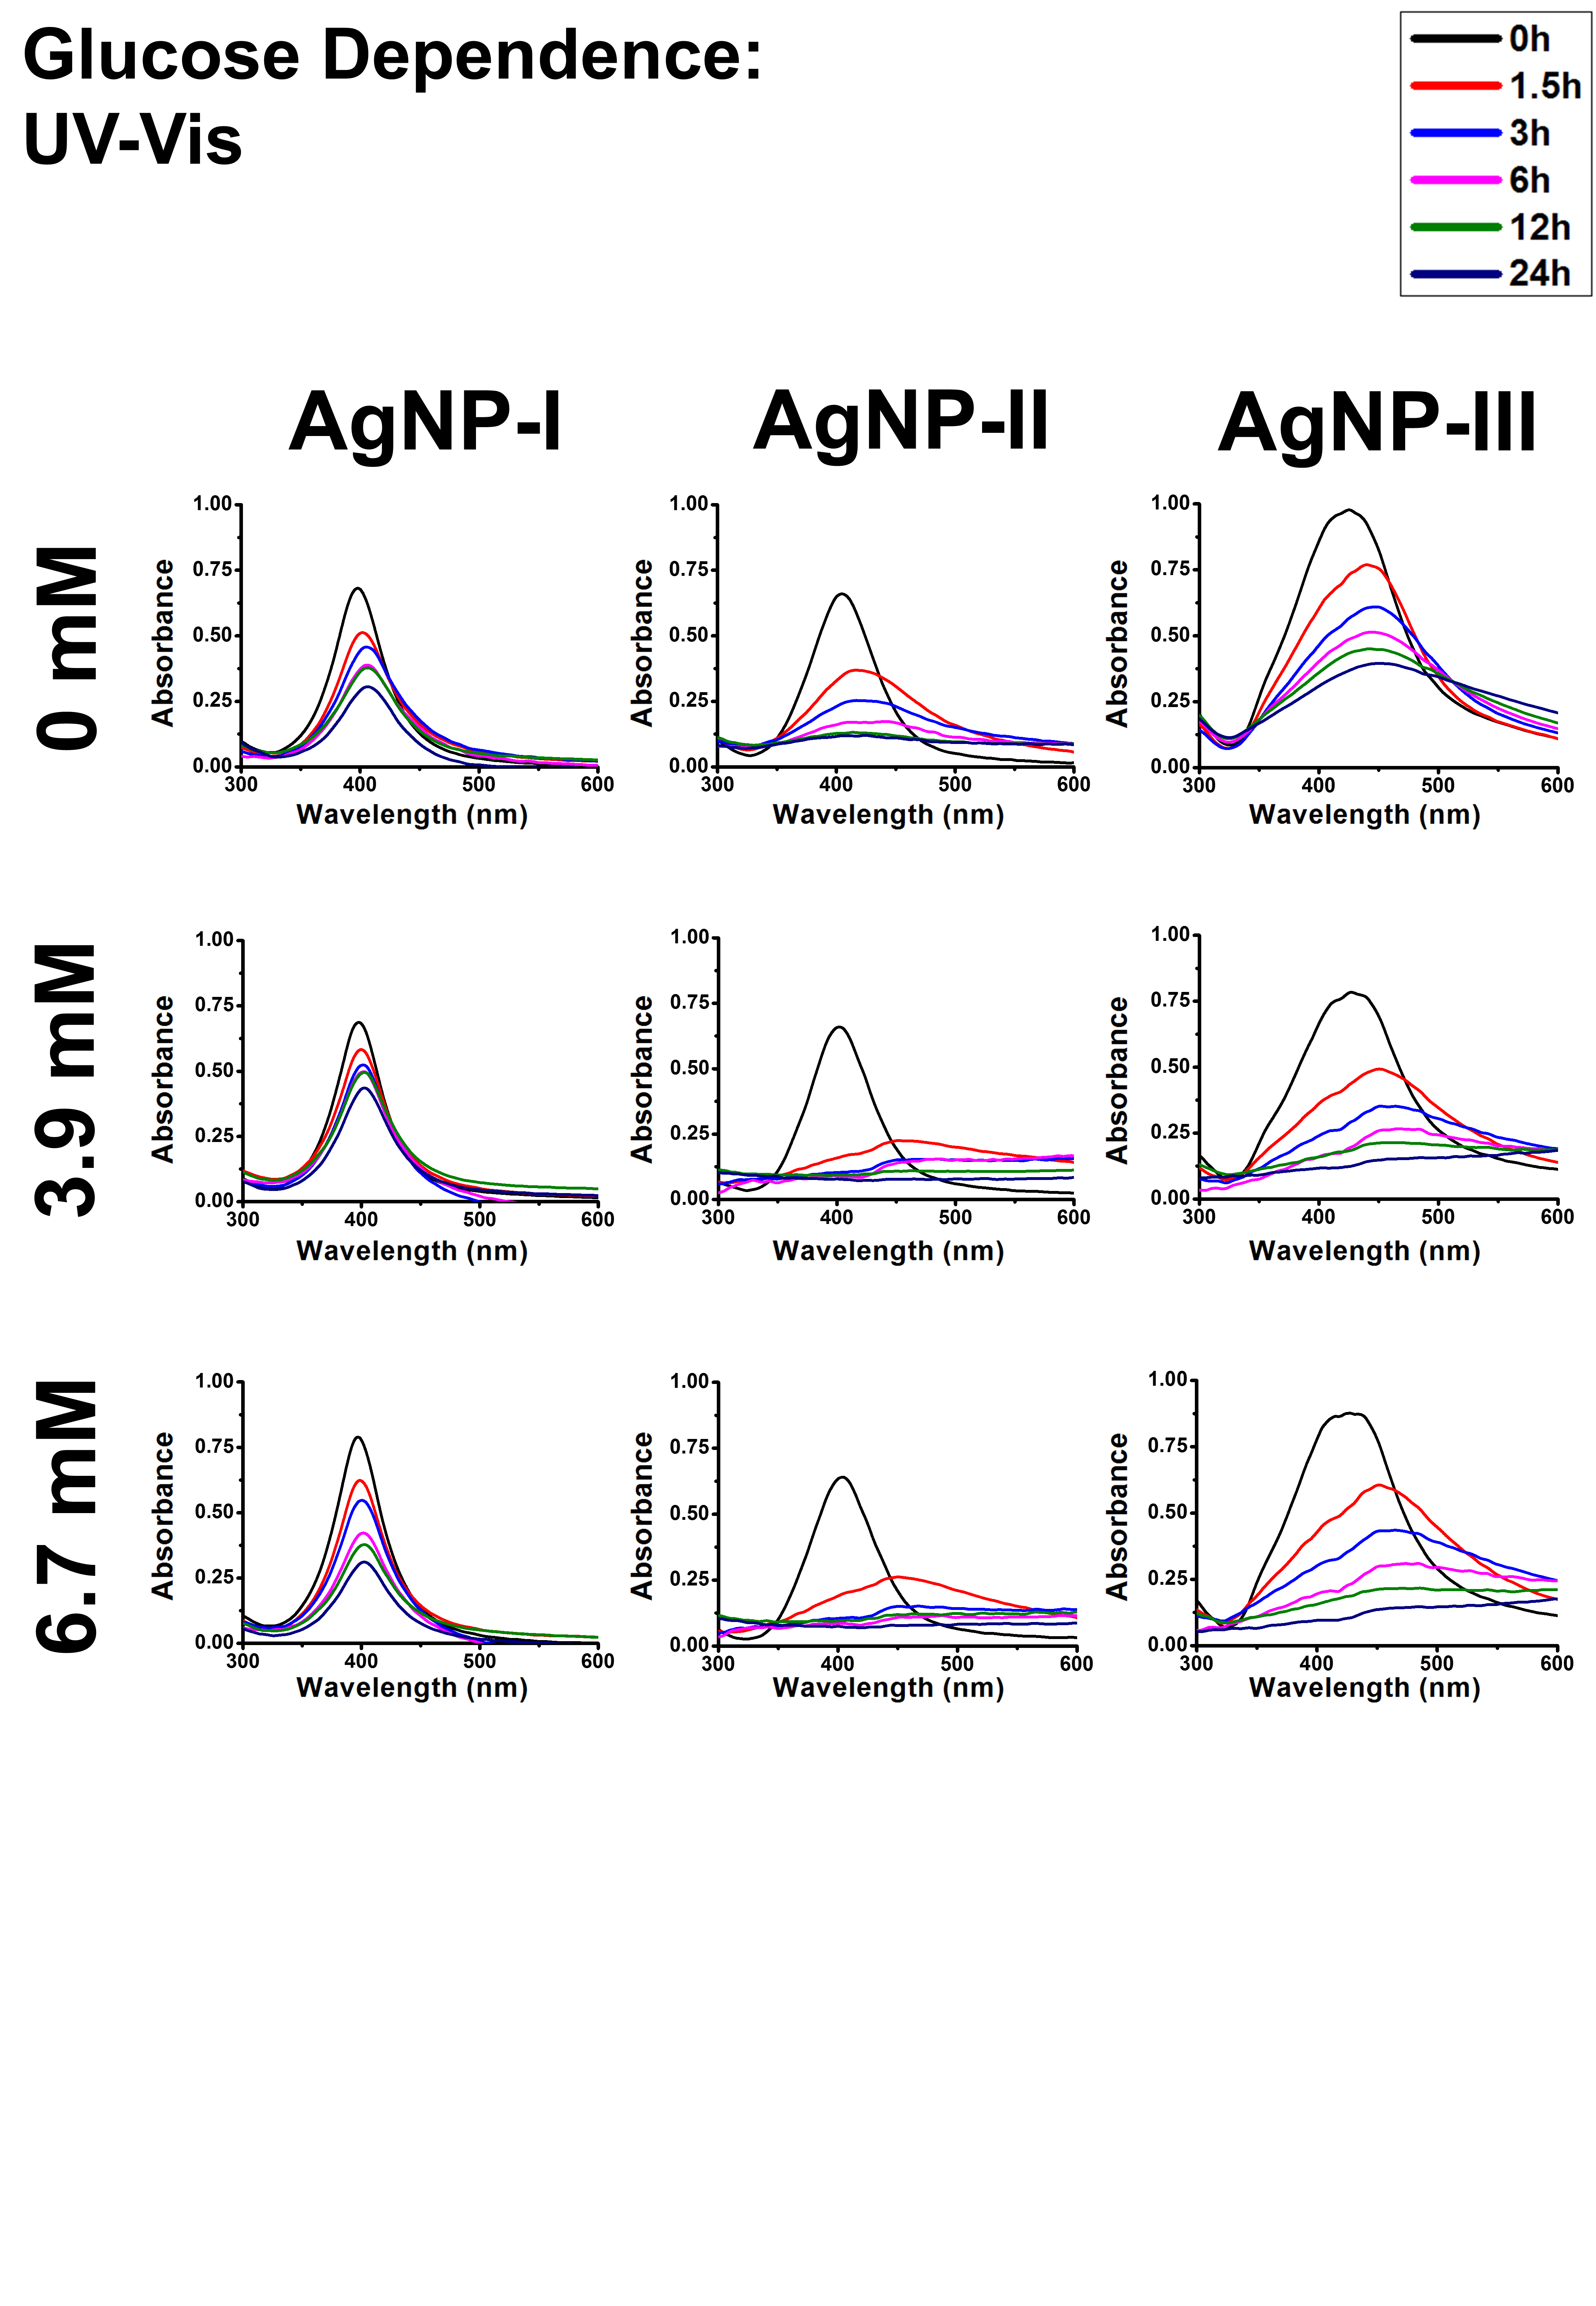


**Figure S4:** UV-Vis absorbance spectra of citrate capped silver nanoparticle samples with increasing sizes: 10 nm: AgNP‑I (Left), 20 nm: AgNP‑II (Middle) and 50 nm: AgNP‑III (Right) over 24 hours in the presence of glutamine.


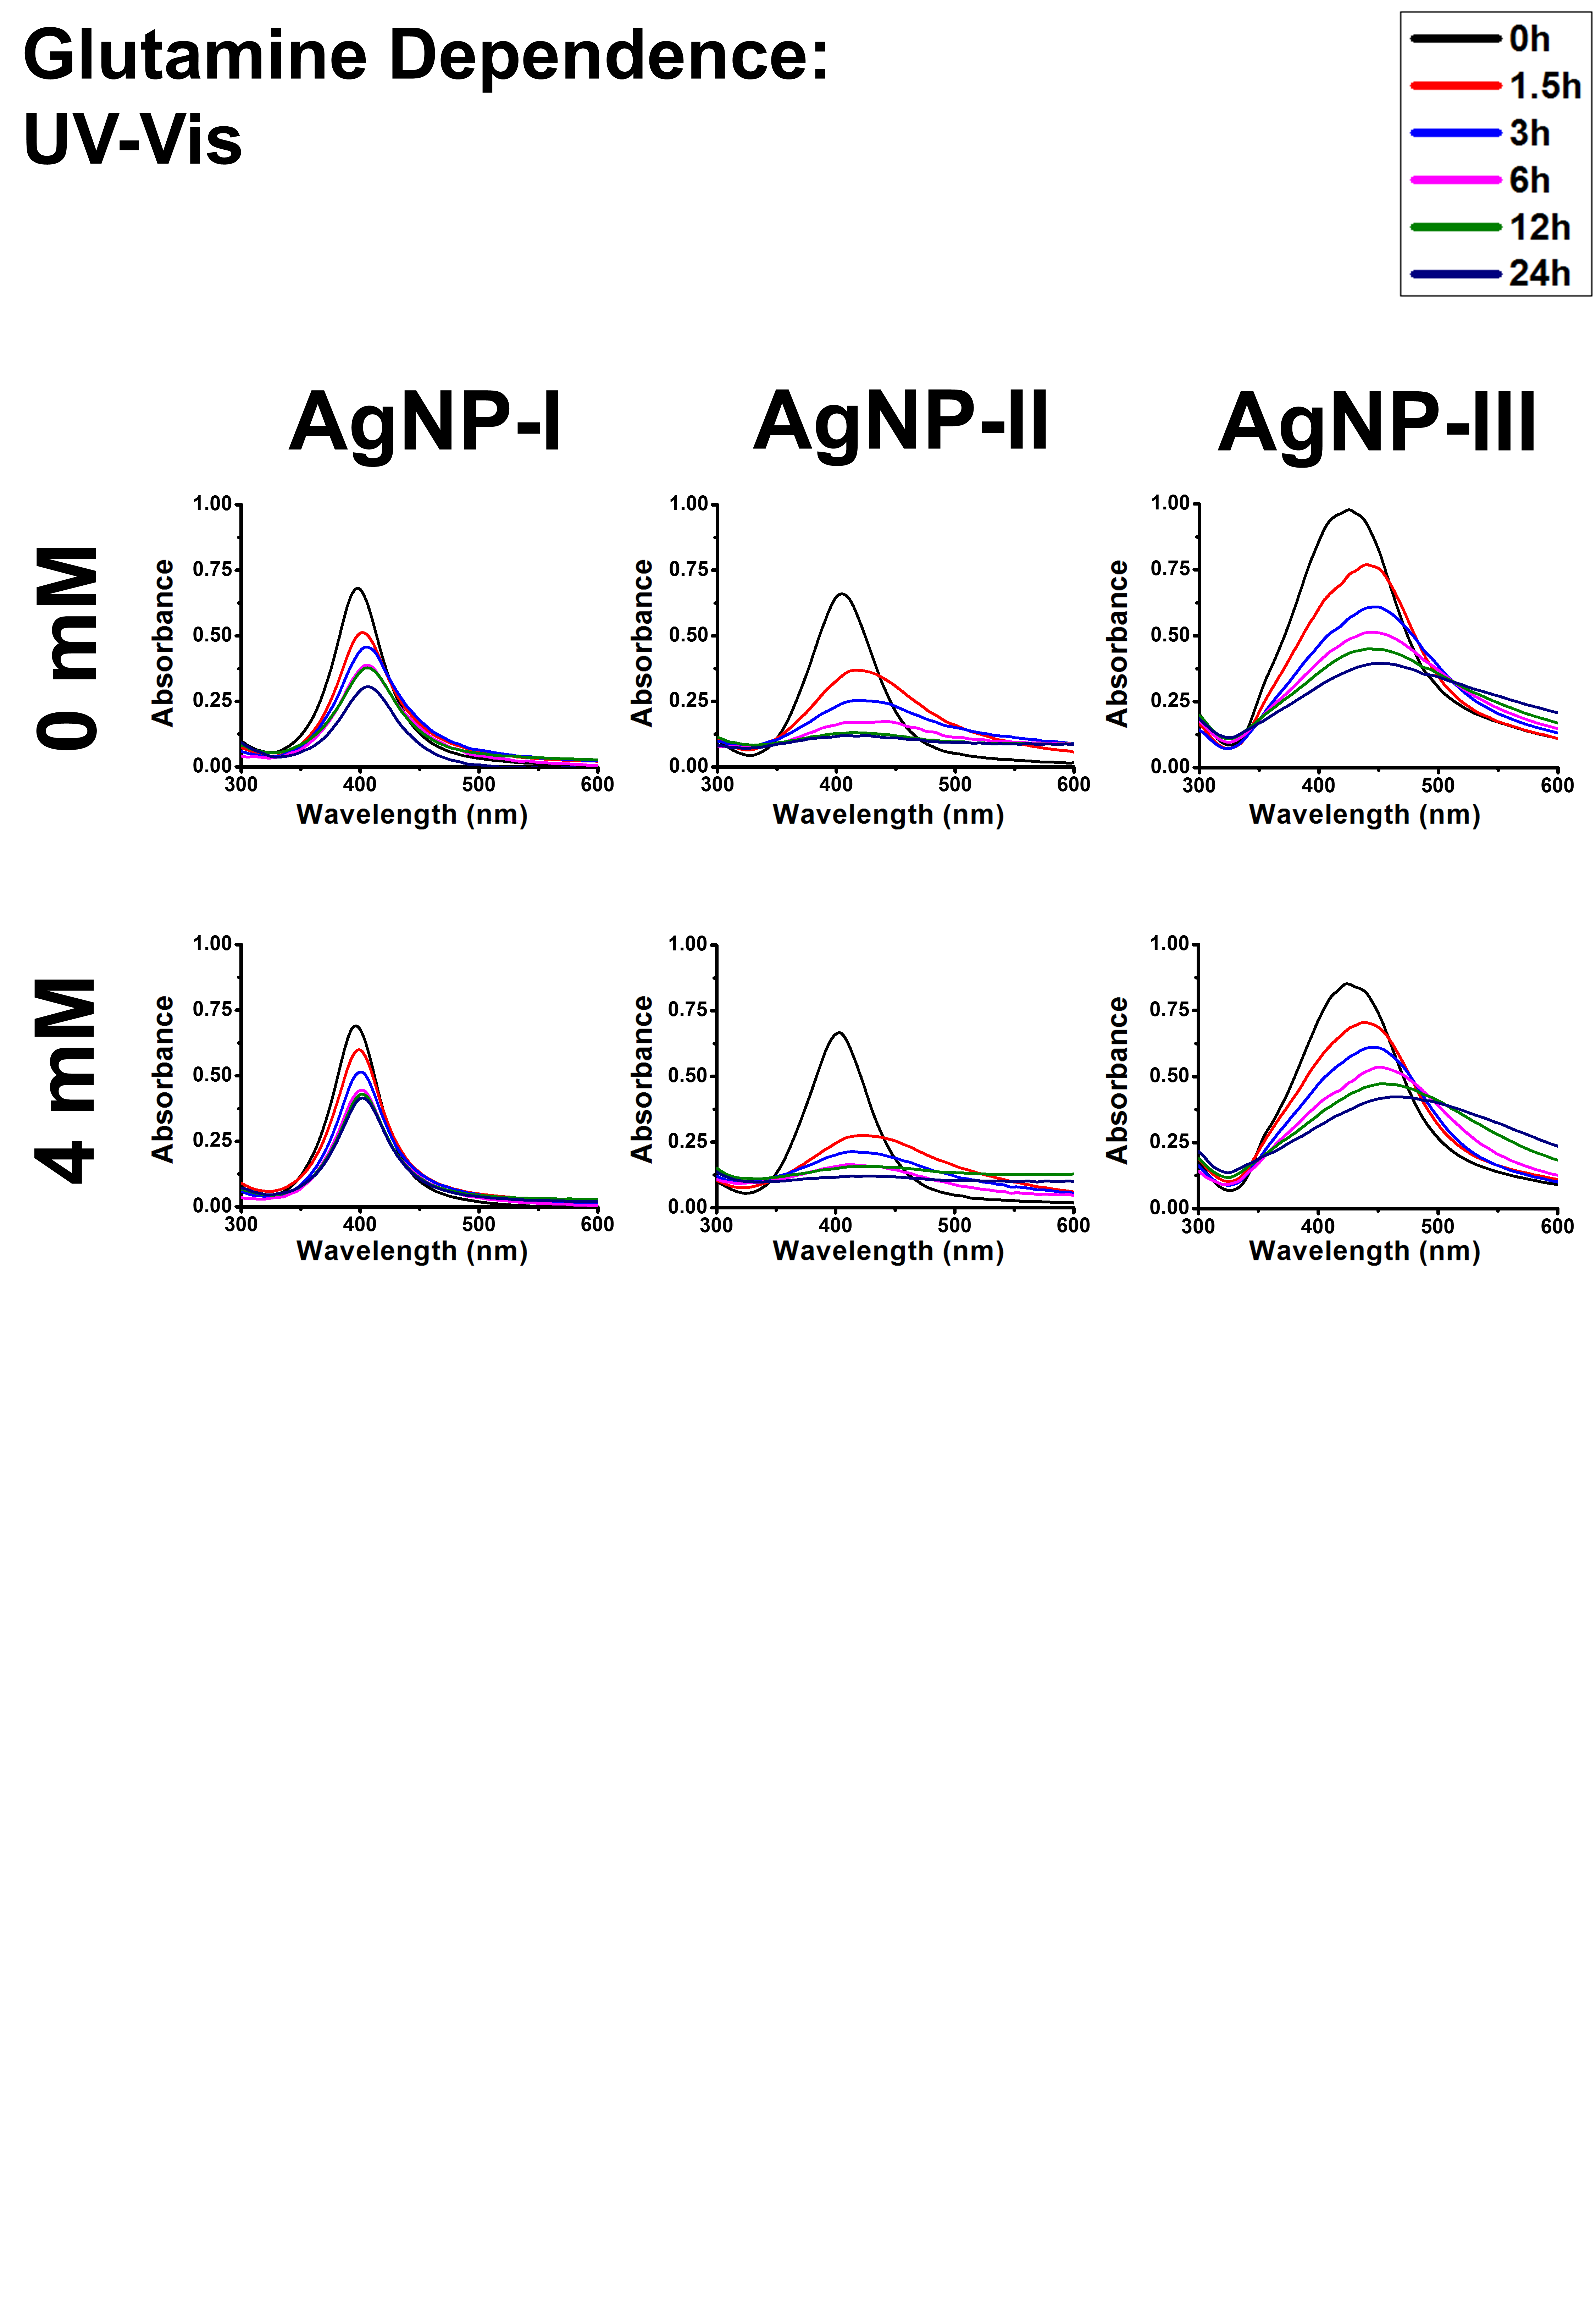


**Figure S5:** UV-Vis absorbance spectra of citrate capped silver nanoparticle samples with increasing sizes: 10 nm: AgNP‑I (Left), 20 nm: AgNP‑II (Middle) and 50 nm: AgNP‑III (Right) over 24 hours in the presence of cell culture components DMEM and FBS.


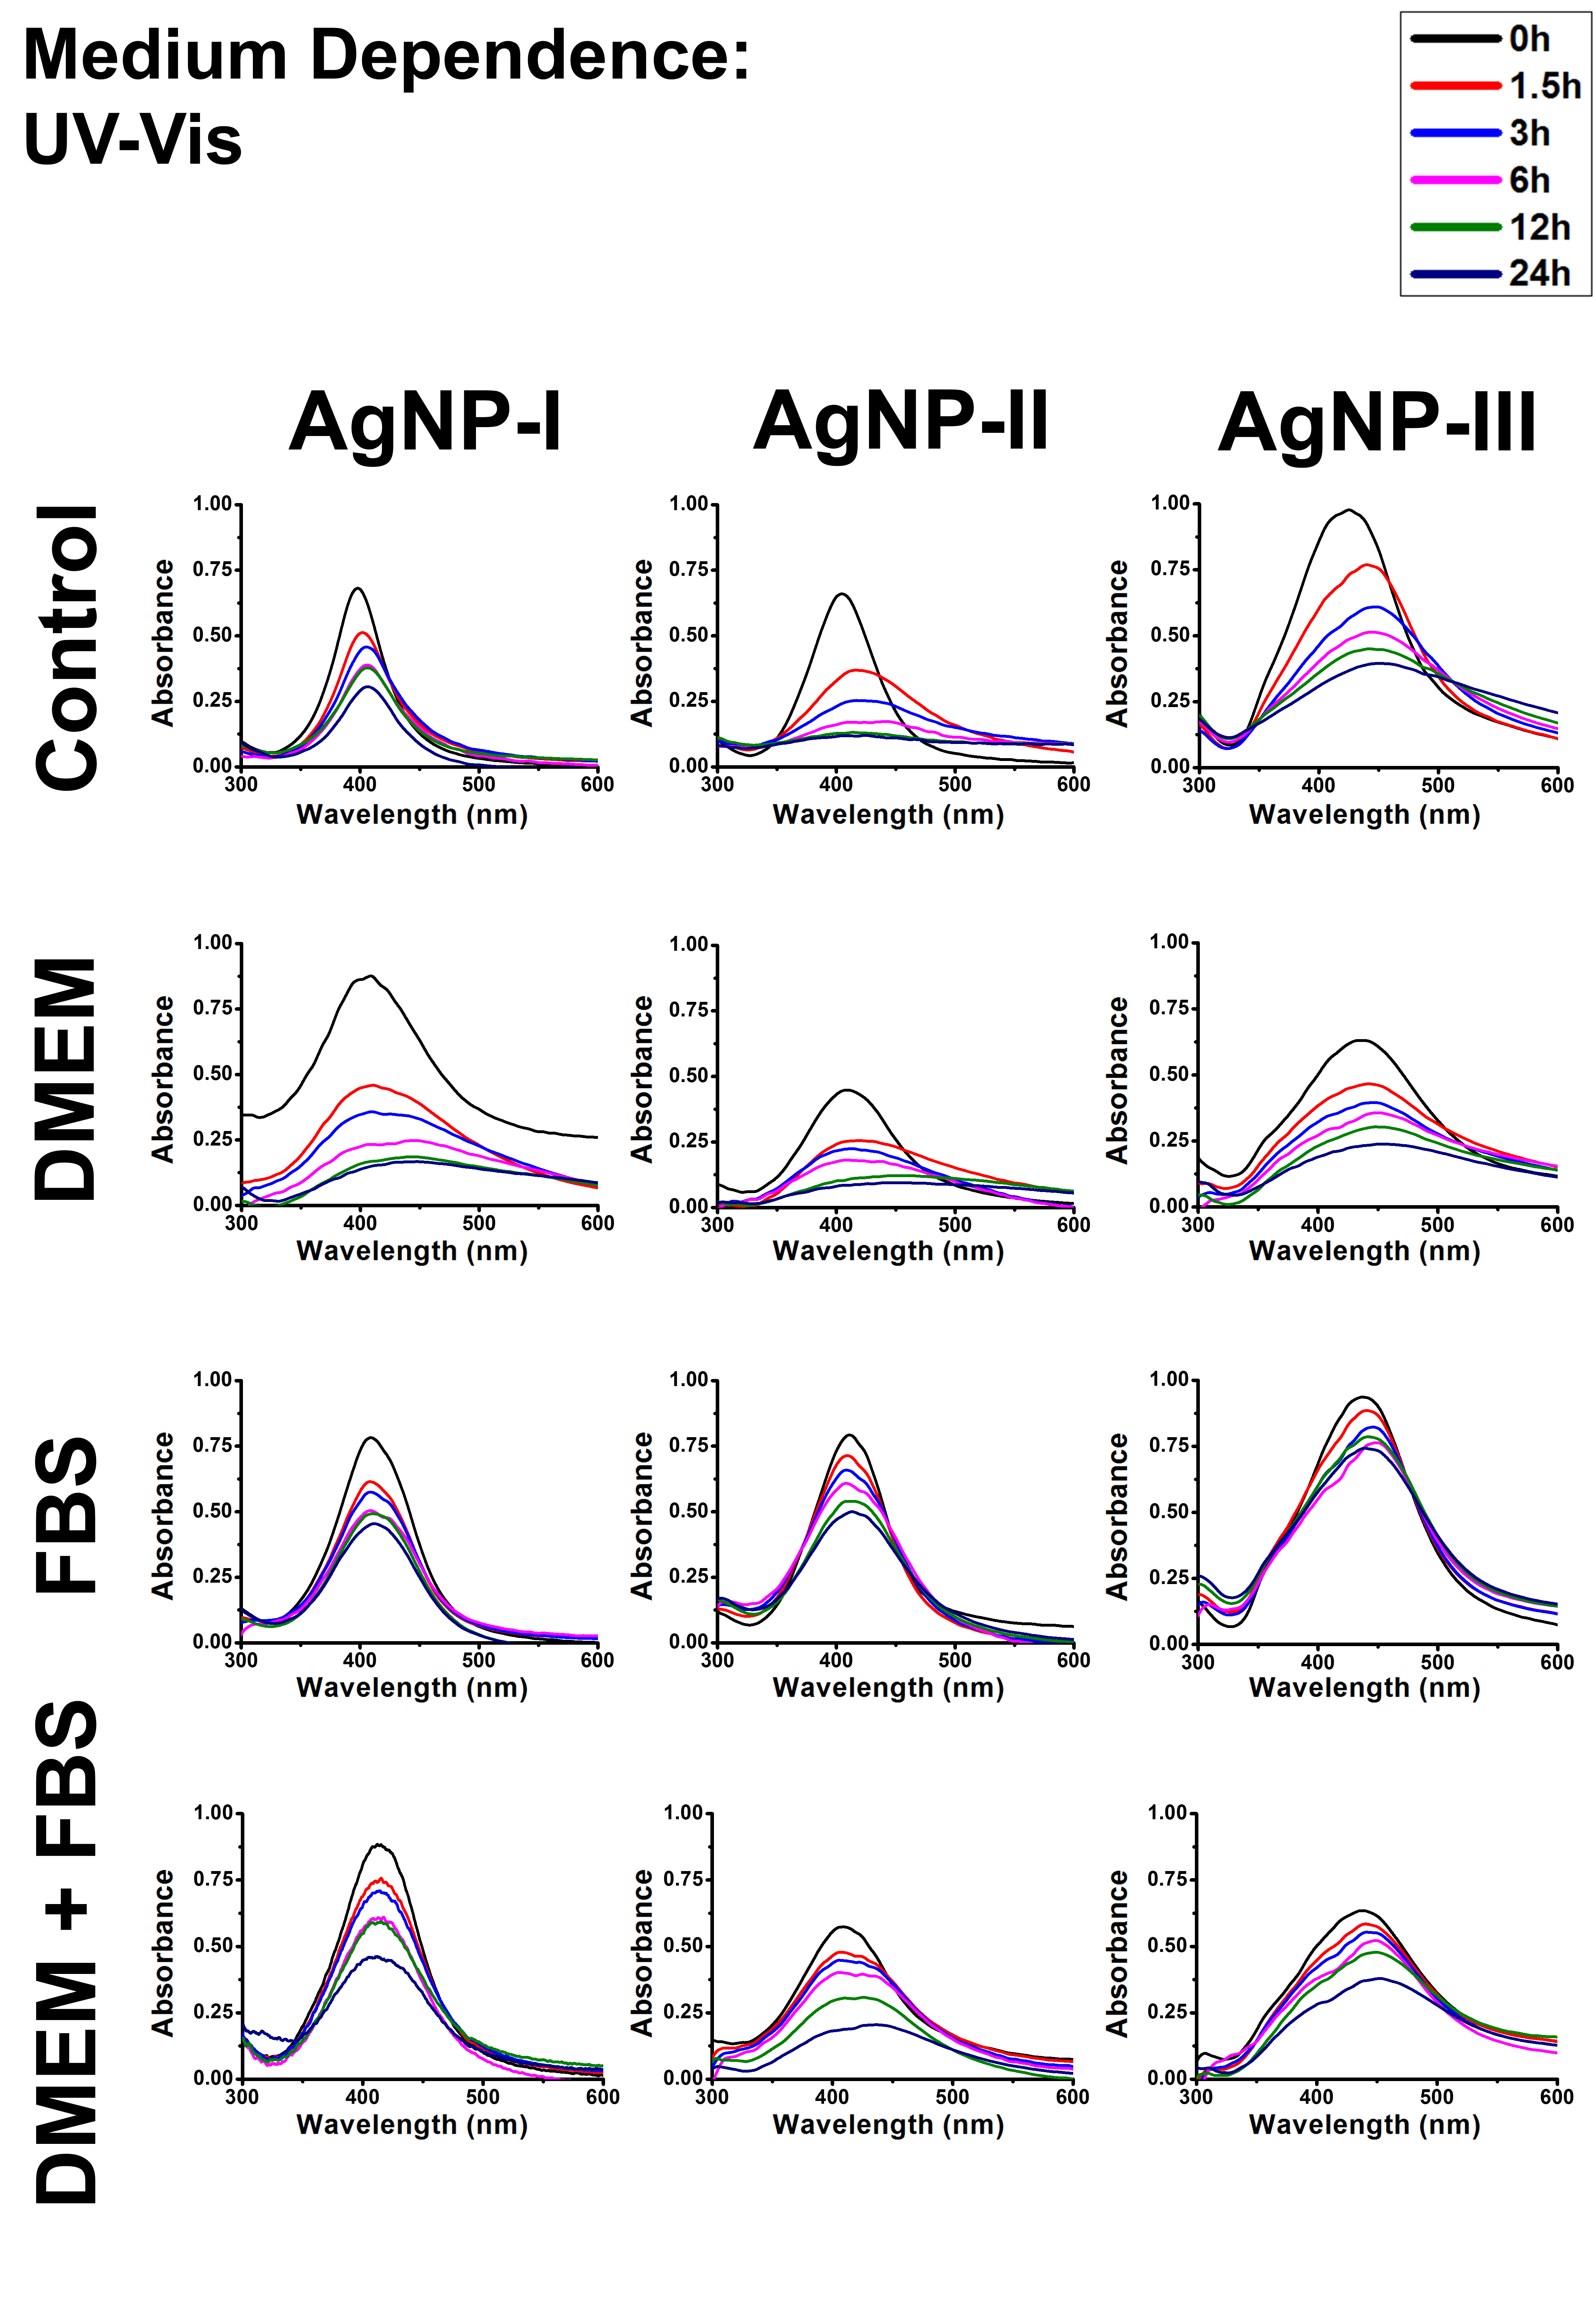

Supplement: Supplementary file 1 [file get_supplementary_file.php]
